# Supplementary material for: Cemented versus Cementless Femoral Fixation for Elective Primary Total Hip Arthroplasty: A Nationwide Analysis of Short-Term Complication and Readmission Rates
Source: MDPI journal article supplement (doi:10.3390/jcm12123945), 2023-06-09
Supplement: s1 [file s1]

## Supplementary Materials:

**Table S1:** Procedure, diagnosis, and exclusion codes

| Procedure                             | ICD-10 Codes                                                                                                                                                                                                                                                                                                                                                                                                                                                                 |
|---------------------------------------|------------------------------------------------------------------------------------------------------------------------------------------------------------------------------------------------------------------------------------------------------------------------------------------------------------------------------------------------------------------------------------------------------------------------------------------------------------------------------|
| All total hip arthroplasty            | “0SRB019”, “0SR9019”, “0SRB029”, “0SR9029”, “0SRB039”, “0SR9039”, “0SRB049”, “0SR9049”, “0SR9069”, “0SR90J9”, “0SRB069”, “0SRB0J9”, “0SRB01A”, “0SR901A”, “0SRB02A”, “0SR902A”, “0SRB03A”, “0SR903A”, “0SRB04A”, “0SR904A”, “0SR906A”, “0SR90JA”, “0SRB06A”, “0SRB0JA”, “0SR901Z”, “0SR902Z”, “0SR903Z”, “0SR904Z”, “0SR906Z”, “0SR907Z”, “0SR90EZ”, “0SR90JZ”, “0SR90KZ”, “0SRB01Z”, “0SRB02Z”, “0SRB03Z”, “0SRB04Z”, “0SRB06Z”, “0SRB07Z”, “0SRB0EZ”, “0SRB0JZ”, “0SRB0KZ” |
| Cemented total hip arthroplasty       | “0SRB019”, “0SR9019”, “0SRB029”, “0SR9029”, “0SRB039”, “0SR9039”, “0SRB049”, “0SR9049”, “0SR9069”, “0SR90J9”, “0SRB069”, “0SRB0J9”                                                                                                                                                                                                                                                                                                                                           |
| Cementless total hip arthroplasty     | “0SRB01A”, “0SR901A”, “0SRB02A”, “0SR902A”, “0SRB03A”, “0SR903A”, “0SRB04A”, “0SR904A”, “0SR906A”, “0SR90JA”, “0SRB06A”, “0SRB0JA”                                                                                                                                                                                                                                                                                                                                           |
| <b>Diagnosis</b>                      |                                                                                                                                                                                                                                                                                                                                                                                                                                                                              |
| Primary osteoarthritis of the hip     | “M1611”, “M1612”, “M160”, “M1610”                                                                                                                                                                                                                                                                                                                                                                                                                                            |
| Rheumatoid arthritis of the hip       | “M05151”, “M05152”, “M05159”, “M05251”, “M05252”, “M05259”, “M05351”, “M05352”, “M05359”, “M05451”, “M05452”, “M05459”, “M05551”, “M05552”, “M05559”, “M05651”, “M05652”, “M05659”, “M05751”, “M05752”, “M05759”, “M05851”, “M05852”, “M05859”, “M05051”, “M05052”, “M05059”                                                                                                                                                                                                 |
| Osteonecrosis of the hip              | “M879”, “M87350”, “M87351”, “M87352”, “M87353”, “M87850”, “M87851”, “M87852”, “M87859”, “M87050”, “M87051”, “M87052”, “M87059”, “M87150”, “M87151”, “M87152”, “M87159”, “M87250”, “M87251”, “M87252”, “M87256”                                                                                                                                                                                                                                                               |
| Secondary osteoarthritis of the hip   | “M1652”, “M1651”, “M1650”, “M166”, “M167”                                                                                                                                                                                                                                                                                                                                                                                                                                    |
| Hip dysplasia                         | “M162”, “M1630”, “M1631”, “M1632”                                                                                                                                                                                                                                                                                                                                                                                                                                            |
| <b>Exclusion Diagnoses/Procedures</b> |                                                                                                                                                                                                                                                                                                                                                                                                                                                                              |
| Abnormal weight loss                  | “R634”                                                                                                                                                                                                                                                                                                                                                                                                                                                                       |
| Anorexia nervosa                      | “F5000”, “F5001”, “F5002”                                                                                                                                                                                                                                                                                                                                                                                                                                                    |
| Malnourishment                        | “R627”, “E43”, “E440”, “E441”, “E46”                                                                                                                                                                                                                                                                                                                                                                                                                                         |
| Malignancy                            | “C4020”, “C4021”, “C4022”, “C4030”, “C4031”, “C4032”, “C4080”, “C4081”, “C4082”, “C4090”, “C4091”, “C4092”, “C414”, “C419”, “C763”, “C7650”, “C7651”, “C7652”, “C96Z”, “C969”                                                                                                                                                                                                                                                                                                |
| Septic arthritis of the hip           | “M00051”, “M00052”, “M00059”, “M00151”, “M00152”, “M00159”, “M00251”, “M00252”, “M00259”, “M00851”, “M00852”, “M00859”, “M01X51”, “M01X52”, “M01X59”                                                                                                                                                                                                                                                                                                                         |

|                   |                                                                                                                                                                                                                                                                                                                                                                                                                                                                                                                                                                                                                                                                                                                                                                                                                                                                                                                                                                                                                                                                                                                                                                                                                                                                                                                                                                                                                                                                                                                                                                                                                                                                                                                                                                                                                                                                                                                                                                                                                                                                                                                                                                                                                                                                                                                                                                                                                                                                                                                                                                                                                                                                                                                                                                                                                                                                                                                                                                                                                                                                                                                                                                                                                                                                                                                                                                                                                                                                                                                                                                                                                                                                                                                                                                                                                                                                                                                                                                                                                      |
|-------------------|----------------------------------------------------------------------------------------------------------------------------------------------------------------------------------------------------------------------------------------------------------------------------------------------------------------------------------------------------------------------------------------------------------------------------------------------------------------------------------------------------------------------------------------------------------------------------------------------------------------------------------------------------------------------------------------------------------------------------------------------------------------------------------------------------------------------------------------------------------------------------------------------------------------------------------------------------------------------------------------------------------------------------------------------------------------------------------------------------------------------------------------------------------------------------------------------------------------------------------------------------------------------------------------------------------------------------------------------------------------------------------------------------------------------------------------------------------------------------------------------------------------------------------------------------------------------------------------------------------------------------------------------------------------------------------------------------------------------------------------------------------------------------------------------------------------------------------------------------------------------------------------------------------------------------------------------------------------------------------------------------------------------------------------------------------------------------------------------------------------------------------------------------------------------------------------------------------------------------------------------------------------------------------------------------------------------------------------------------------------------------------------------------------------------------------------------------------------------------------------------------------------------------------------------------------------------------------------------------------------------------------------------------------------------------------------------------------------------------------------------------------------------------------------------------------------------------------------------------------------------------------------------------------------------------------------------------------------------------------------------------------------------------------------------------------------------------------------------------------------------------------------------------------------------------------------------------------------------------------------------------------------------------------------------------------------------------------------------------------------------------------------------------------------------------------------------------------------------------------------------------------------------------------------------------------------------------------------------------------------------------------------------------------------------------------------------------------------------------------------------------------------------------------------------------------------------------------------------------------------------------------------------------------------------------------------------------------------------------------------------------------------------|
| Fracture of femur | "S72001A", "S72002A", "S72009A", "S72011A",<br>"S72012A", "S72019A", "S72021A", "S72022A", "S72023A",<br>"S72024A", "S72025A", "S72026A", "S72031A", "S72032A",<br>"S72033A", "S72034A", "S72035A", "S72036A", "S72041A",<br>"S72042A", "S72043A", "S72044A", "S72045A", "S72046A",<br>"S72051A", "S72052A", "S72059A", "S72061A", "S72062A",<br>"S72063A", "S72064A", "S72065A", "S72066A", "S72091A",<br>"S72092A", "S72099A", "S72101A", "S72102A", "S72109A",<br>"S72111A", "S72112A", "S72113A", "S72114A", "S72115A",<br>"S72116A", "S72121A", "S72122A", "S72123A", "S72124A",<br>"S72125A", "S72126A", "S72131A", "S72132A", "S72133A",<br>"S72134A", "S72135A", "S72136A", "S72141A", "S72142A",<br>"S72143A", "S72144A", "S72145A", "S72146A", "S72001B",<br>"S72001C", "S72002B", "S72002C", "S72009B", "S72009C",<br>"S72011B", "S72011C", "S72012B", "S72012C", "S72019B",<br>"S72019C", "S72021B", "S72021C", "S72022B", "S72022C",<br>"S72023B", "S72023C", "S72024B", "S72024C", "S72025B",<br>"S72025C", "S72026B", "S72026C", "S72031B", "S72031C",<br>"S72032B", "S72032C", "S72033B", "S72033C", "S72034B",<br>"S72034C", "S72034B", "S72034C", "S72035B", "S72035C",<br>"S72036B", "S72036C", "S72041B", "S72041C", "S72042B",<br>"S72042C", "S72043B", "S72043C", "S72044B", "S72044C",<br>"S72045B", "S72045C", "S72046B", "S72046C", "S72051B",<br>"S72051C", "S72052B", "S72052C", "S72059B", "S72059C",<br>"S72061B", "S72061C", "S72062B", "S72062C", "S72063B",<br>"S72063C", "S72064B", "S72064C", "S72065B", "S72065C",<br>"S72066B", "S72066C", "S72091B", "S72091C", "S72092B",<br>"S72092C", "S72099B", "S72099C", "S72101B", "S72101C",<br>"S7221B", "S72102C", "S72109B", "S72109C", "S72111B",<br>"S72111C", "S72112B", "S72112C", "S72113B", "S72113C",<br>"S72114B", "S72114C", "S72115B", "S72115C", "S72116B",<br>"S72116C", "S72121B", "S72121C", "S72122B", "S72122C",<br>"S72123B", "S72123C", "S72124B", "S72124C", "S72125B",<br>"S72125C", "S72126B", "S72126C", "S72131B", "S72131C",<br>"S72132B", "S72132C", "S72133B", "S72133C", "S72134B",<br>"S72134C", "S72135B", "S72135C", "S72136B", "S72136C",<br>"S72141B", "S72141C", "S72142B", "S72142C", "S72143B",<br>"S72143C", "S72144B", "S72144C", "S72145B", "S72145C",<br>"S72146B", "S72146C", "S7221XB", "S7221XC", "S72221XB",<br>"S7222XC", "S7223XB", "S7223XC", "S7224XB", "S7224XC",<br>"S7225XB", "S7225XC", "S7226XB", "S7226XC", "S72301B",<br>"S72301C", "S72302B", "S72302C", "S72309B", "S72309C",<br>"S72321B", "S72321C", "S72322B", "S72322C", "S72323B",<br>"S72323C", "S72324B", "S72324C", "S72325B", "S72325C",<br>"S72326B", "S72326C", "S72331B", "S72331C", "S72332B",<br>"S72332C", "S72333B", "S72333C", "S72334B", "S72334C",<br>"S72335B", "S72335C", "S72336B", "S72336C", "S72341B",<br>"S72341C", "S72342B", "S72342C", "S72343B", "S72343C",<br>"S72344B", "S72344C", "S72345B", "S72345C", "S72346B",<br>"S72346C", "S72351B", "S72351C", "S72352B", "S72352C",<br>"S72353B", "S72353C", "S72354B", "S72354C", "S72355B",<br>"S72355C", "S72356B", "S72356C", "S72361B", "S72361C",<br>"S72362B", "S72362C", "S72363B", "S72363C", "S72364B",<br>"S72364C", "S72365B", "S72365C", "S72366B", "S72366C",<br>"S72391B", "S72391C", "S72392B", "S72392C", "S72399B",<br>"S72399C", "S72401B", "S72401C", "S72402B", "S72402C",<br>"S72409B", "S72409C", "S72411B", "S72411C", "S72412B",<br>"S72412C", "S72413B", "S72413C", "S72414B", "S72414C",<br>"S72415B", "S72415C", "S72416B", "S72416C", "S72421B",<br>"S72421C", "S72422B", "S72422C", "S72423B", "S72423C",<br>"S72424B", "S72424C", "S72425B", "S72425C", "S72426B",<br>"S72426C", "S72431B", "S72431C", "S72432B", "S72432C",<br>"S72433B", "S72433C", "S72434B", "S72434C", "S72435B",<br>"S72435C", "S72436B", "S72436C", "S72441B", "S72441C",<br>"S72442B", "S72442C", "S72443B", "S72443C", "S72444B",<br>"S72444C", "S72445B", "S72445C", "S72446B",<br>"S72446C", "S72451B", "S72451C", "S72452B", "S72452C", |
|-------------------|----------------------------------------------------------------------------------------------------------------------------------------------------------------------------------------------------------------------------------------------------------------------------------------------------------------------------------------------------------------------------------------------------------------------------------------------------------------------------------------------------------------------------------------------------------------------------------------------------------------------------------------------------------------------------------------------------------------------------------------------------------------------------------------------------------------------------------------------------------------------------------------------------------------------------------------------------------------------------------------------------------------------------------------------------------------------------------------------------------------------------------------------------------------------------------------------------------------------------------------------------------------------------------------------------------------------------------------------------------------------------------------------------------------------------------------------------------------------------------------------------------------------------------------------------------------------------------------------------------------------------------------------------------------------------------------------------------------------------------------------------------------------------------------------------------------------------------------------------------------------------------------------------------------------------------------------------------------------------------------------------------------------------------------------------------------------------------------------------------------------------------------------------------------------------------------------------------------------------------------------------------------------------------------------------------------------------------------------------------------------------------------------------------------------------------------------------------------------------------------------------------------------------------------------------------------------------------------------------------------------------------------------------------------------------------------------------------------------------------------------------------------------------------------------------------------------------------------------------------------------------------------------------------------------------------------------------------------------------------------------------------------------------------------------------------------------------------------------------------------------------------------------------------------------------------------------------------------------------------------------------------------------------------------------------------------------------------------------------------------------------------------------------------------------------------------------------------------------------------------------------------------------------------------------------------------------------------------------------------------------------------------------------------------------------------------------------------------------------------------------------------------------------------------------------------------------------------------------------------------------------------------------------------------------------------------------------------------------------------------------------------------------|

|                                            |                                                                                                                                                                                                                                                                                                                                                                                                                                                                                                                                                                                                                                                                                                                                                                                                                                                                                                                                                                                                                                                                                                                                                                                                                                                                                                                                                                                                                                                                                                                                           |
|--------------------------------------------|-------------------------------------------------------------------------------------------------------------------------------------------------------------------------------------------------------------------------------------------------------------------------------------------------------------------------------------------------------------------------------------------------------------------------------------------------------------------------------------------------------------------------------------------------------------------------------------------------------------------------------------------------------------------------------------------------------------------------------------------------------------------------------------------------------------------------------------------------------------------------------------------------------------------------------------------------------------------------------------------------------------------------------------------------------------------------------------------------------------------------------------------------------------------------------------------------------------------------------------------------------------------------------------------------------------------------------------------------------------------------------------------------------------------------------------------------------------------------------------------------------------------------------------------|
|                                            | "S72453B", "S72453C", "S72454B", "S72454C", "S72455B",<br>"S72455C", "S72456B", "S72456C", "S72461B", "S72461C",<br>"S72462B", "S72462C", "S72463B", "S72463C", "S72464B",<br>"S72464C", "S72465B", "S72465C", "S72466B", "S72466C",<br>"S72491B", "S72491C", "S72492B", "S72492C", "S72499B",<br>"S72499C", "S728X1B", "S728X1C", "S728X2B", "S728X2C",<br>"S728X9B", "S728X9C", "S7290XB", "S7290XC", "S7291XB",<br>"S7291XC", "S7292XB", "S7292XC", "S7221XA", "S7222XA",<br>"S7223XA", "S7224XA", "S7225XA", "S7226XA", "S72301A",<br>"S72302A", "S72309A", "S72321A", "S72322A", "S72323A",<br>"S72324A", "S72325A", "S72326A", "S72331A", "S72332A",<br>"S72333A", "S72334A", "S72335A", "S72336A", "S72341A",<br>"S72342A", "S72343A", "S72344A", "S72345A", "S72346A",<br>"S72351A", "S72352A", "S72353A", "S72354A", "S72355A",<br>"S72356A", "S72361A", "S72362A", "S72363A", "S72364A",<br>"S72365A", "S72366A", "S72391A", "S72392A", "S72399A",<br>"S72401A", "S72402A", "S72409A", "S72411A", "S72412A",<br>"S72413A", "S72414A", "S72415A", "S72416A", "S72421A",<br>"S72422A", "S72423A", "S72424A", "S72425A", "S72426A",<br>"S72431A", "S72432A", "S72433A", "S72434A", "S72435A",<br>"S72436A", "S72441A", "S72442A", "S72443A", "S72444A",<br>"S72445A", "S72446A", "S72451A", "S72452A", "S72453A",<br>"S72454A", "S72455A", "S72456A", "S72461A", "S72462A",<br>"S72463A", "S72464A", "S72465A", "S72466A", "S72491A",<br>"S72492A", "S72499A", "S728X1A", "S728X2A", "S728X9A",<br>"S7290XA", "S7291XA", "S7292XA" |
| Hemiarthroplasty                           | "0SRA009", "0SRA019", "0SRA039", "0SRA0J9", "0SRE009",<br>"0SRE019", "0SRE039", "0SRE0J9", "0SRR019", "0SRR039",<br>"0SRR0J9", "0SRS019", "0SRS039", "0SRS0J9", "0SRA00A",<br>"0SRA01A", "0SRA03A", "0SRA0JA", "0SRE00A", "0SRE01A",<br>"0SRE03A", "0SRE0JA", "0SRR01A", "0SRR03A", "0SRR0JA",<br>"0SRS01A", "0SRS03A", "0SRS0JA", "0SRR01Z", "0SRR03Z",<br>"0SRR07Z", "0SRR0JZ", "0SRR0KZ", "0SRS01Z", "0SRS03Z",<br>"0SRS07Z", "0SRS0JZ", "0SRS0KZ", "0SRA00Z", "0SRA01Z",<br>"0SRA03Z", "0SRA07Z", "0SRA0JZ", "0SRA0KZ",<br>"0SRE00Z", "0SRE01Z", "0SRE03Z", "0SRE07Z", "0SRE0JZ",<br>"0SRE0KZ"                                                                                                                                                                                                                                                                                                                                                                                                                                                                                                                                                                                                                                                                                                                                                                                                                                                                                                                                        |
| Prior total or partial hip arthroplasty    | "Z9664", "Z96641", "Z96642", "Z96643", "Z96649"                                                                                                                                                                                                                                                                                                                                                                                                                                                                                                                                                                                                                                                                                                                                                                                                                                                                                                                                                                                                                                                                                                                                                                                                                                                                                                                                                                                                                                                                                           |
| Revision total or partial hip arthroplasty | "0SW909Z", "0SWB09Z", "0SW908Z", "0SW938Z",<br>"0SW948Z", "0SW9X8Z", "0SWB08Z", "0SWB38Z",<br>"0SWB48Z", "0SWBX8Z", "0SW90BZ", "0SWB0BZ"<br><br>"0SP90EZ" and "0SR90EZ"<br>"0SPB0EZ" and "0SRB0EZ"<br>"0SP909Z" and "0SW909Z"<br>"0SPB09Z" and "0SWB09Z"                                                                                                                                                                                                                                                                                                                                                                                                                                                                                                                                                                                                                                                                                                                                                                                                                                                                                                                                                                                                                                                                                                                                                                                                                                                                                  |

**Table S2.** Complication Codes

| Complication                           | ICD-10 Codes                 |
|----------------------------------------|------------------------------|
| Dislocation of internal hip prosthesis | "T84020A", "T84021A"         |
| Periprosthetic fracture                | "M9701XA", "M9702XA"         |
| Intraoperative pelvic fracture         | "M9665"                      |
| Intraoperative femur fracture          | "M96661", "M96662", "M96669" |
| Periprosthetic joint infection         | "T8451XA", "T8452XA"         |

|                                                                                             |                                            |
|---------------------------------------------------------------------------------------------|--------------------------------------------|
| Broken internal hip prosthesis                                                              | “T84010A”, “T84011A”                       |
| Mechanical loosening of internal hip prosthetic joint                                       | “T84030A”, “T84031A”                       |
| Periprosthetic osteolysis of internal prosthetic hip joint                                  | “T84050A”, “T84051A”                       |
| Wear of articular bearing surface of internal prosthetic hip joint                          | “T84060A”, “T84061A”                       |
| Other mechanical complication of internal hip prosthesis                                    | “T84090A”, “T84091A”                       |
| Embolism due to internal orthopedic prosthetic devices, implants and grafts                 | “T8481XA”                                  |
| Fibrosis due to internal orthopedic prosthetic devices, implants and grafts                 | “T8482XA”                                  |
| Hemorrhage due to internal orthopedic prosthetic devices, implants and grafts               | “T8483XA”                                  |
| Pain due to internal orthopedic prosthetic devices, implants and grafts                     | “T8484XA”                                  |
| Stenosis due to internal orthopedic prosthetic devices, implants and grafts                 | “T8485XA”                                  |
| Thrombosis due to internal orthopedic prosthetic devices, implants and grafts               | “T8486XA”                                  |
| Other specified complication of internal orthopedic prosthetic devices, implants and grafts | “T8489XA”                                  |
| Postprocedural shock                                                                        | “T8110XA”, “T8111XA”, “T8112XA”, “T8119XA” |
| Wound dehiscence, unspecified                                                               | “T8130XA”                                  |
| Superficial wound dehiscence                                                                | “T8131XA”                                  |
| Deep wound dehiscence                                                                       | “T8132XA”                                  |
| Disruption of traumatic injury wound repair                                                 | “T8133XA”                                  |
| Infection following a procedure, unspecified                                                | “T8140XA”                                  |
| Superficial surgical site infection following a procedure                                   | “T8141XA”                                  |
| Deep surgical site infection following a procedure                                          | “T8142XA”                                  |
| Sepsis following a procedure                                                                | “T8144XA”                                  |
| Infection following a procedure, other surgical site                                        | “T8149XA”                                  |
| Major osseous defect, pelvic region and thigh                                               | “M89751”, “M89752”, “M89759”               |
| Toxic effect of chromium and its compounds, accidental (unintentional)                      | “T562X1A”                                  |

|                                                                        |                                                                                                                                                                                                                                                                                                                                                                                                                                                                                                                                                                                                                                                                                                                                                                                                                                                                                                                                                   |
|------------------------------------------------------------------------|---------------------------------------------------------------------------------------------------------------------------------------------------------------------------------------------------------------------------------------------------------------------------------------------------------------------------------------------------------------------------------------------------------------------------------------------------------------------------------------------------------------------------------------------------------------------------------------------------------------------------------------------------------------------------------------------------------------------------------------------------------------------------------------------------------------------------------------------------------------------------------------------------------------------------------------------------|
| Toxic effect of unspecified metal (cobalt), accidental (unintentional) | “T5691XA”                                                                                                                                                                                                                                                                                                                                                                                                                                                                                                                                                                                                                                                                                                                                                                                                                                                                                                                                         |
| Intraoperative hemorrhage and hematoma                                 | “M96810”                                                                                                                                                                                                                                                                                                                                                                                                                                                                                                                                                                                                                                                                                                                                                                                                                                                                                                                                          |
| Postprocedural hemorrhage                                              | “M96830”                                                                                                                                                                                                                                                                                                                                                                                                                                                                                                                                                                                                                                                                                                                                                                                                                                                                                                                                          |
| Postprocedural hematoma                                                | “M96840”                                                                                                                                                                                                                                                                                                                                                                                                                                                                                                                                                                                                                                                                                                                                                                                                                                                                                                                                          |
| Postprocedural seroma                                                  | “M96842”                                                                                                                                                                                                                                                                                                                                                                                                                                                                                                                                                                                                                                                                                                                                                                                                                                                                                                                                          |
| Other intraoperative and postprocedural complications                  | “M9689”                                                                                                                                                                                                                                                                                                                                                                                                                                                                                                                                                                                                                                                                                                                                                                                                                                                                                                                                           |
| Acute myocardial infarction                                            | “I210”, “I2101”, “I2102”, “I2109”, “I211”, “I2111”, “I2119”, “I212”, “I2121”, “I2129”, “I213”, “I214”, “I219”, “I21A”, “I21A1”, “I21A9”, “I220”, “I221”, “I222”, “I228”, “I229”                                                                                                                                                                                                                                                                                                                                                                                                                                                                                                                                                                                                                                                                                                                                                                   |
| Pneumonia                                                              | “J120”, “J121”, “J122”, “J123”, “J128”, “J1281”, “J1289”, “J129”, “J13”, “J14”, “J150”, “J151”, “J152”, “J1520”, “J1521”, “J15211”, “J15212”, “J1529”, “J153”, “J154”, “J155”, “J156”, “J157”, “J158”, “J159”, “J160”, “J168”, “J17”, “J180”, “J181”, “J182”, “J188”, “J189”                                                                                                                                                                                                                                                                                                                                                                                                                                                                                                                                                                                                                                                                      |
| Respiratory failure                                                    | “J9600”, “J9601”, “J9602”, “J9610”, “J9611”, “J9612”, “J9620”, “J9621”, “J9622”, “J9690”, “J9691”, “J9692”, “J952”, “J953”, “J95821”, “J95822”, “J80”, “R0600”, “R0601”, “R0602”, “R0603”, “R0609”, “R069”                                                                                                                                                                                                                                                                                                                                                                                                                                                                                                                                                                                                                                                                                                                                        |
| Acute renal failure                                                    | “N170”, “N171”, “N172”, “N178”, “N179”, “N19”                                                                                                                                                                                                                                                                                                                                                                                                                                                                                                                                                                                                                                                                                                                                                                                                                                                                                                     |
| Cerebral infarction                                                    | “I6300”, “I6301”, “I63011”, “I63012”, “I63013”, “I63019”, “I6302”, “I63031”, “I63032”, “I63033”, “I63039”, “I6309”, “I6310”, “I6311”, “I63111”, “I63112”, “I63113”, “I63119”, “I6312”, “I63131”, “I63132”, “I63133”, “I63139”, “I6319”, “I6320”, “I6321”, “I63211”, “I63212”, “I63213”, “I63219”, “I6322”, “I63231”, “I63232”, “I63233”, “I63239”, “I6329”, “I6330”, “I6331”, “I63312”, “I63313”, “I63319”, “I63321”, “I63322”, “I63323”, “I63329”, “I63331”, “I63332”, “I63333”, “I63339”, “I63341”, “I63342”, “I63343”, “I63349”, “I6339”, “I6340”, “I63411”, “I63412”, “I63413”, “I63419”, “I63421”, “I63422”, “I63423”, “I63429”, “I63431”, “I63432”, “I63433”, “I63439”, “I63441”, “I63442”, “I63443”, “I63449”, “I6349”, “I6350”, “I63511”, “I63512”, “I63513”, “I63519”, “I63521”, “I63522”, “I63523”, “I63529”, “I63531”, “I63532”, “I63533”, “I63539”, “I63541”, “I63542”, “I63543”, “I63549”, “I6359”, “I636”, “I6381”, “I6389”, “I639” |
| Peripheral nerve injury                                                | “S7400XA”, “S7402XA”, “S7402XA”, “S7410XA”, “S7411XA”, “S7412XA”, “S8400XA”, “S8401XA”, “S8402XA”, “S8410XA”, “S8411XA”, “S8412XA”, “S7420XA”, “S7421XA”, “S7422XA”, “S8420XA”, “S8421XA”, “S8422XA”, “S748X1A”, “S748X2A”, “S748X9A”, “S7490XA”, “S7491XA”, “S7492XA”, “S84801A”, “S84802A”, “S84809A”, “S8490XA”, “S8491XA”, “S8492XA”, “G5700”, “G5701”, “G5702”, “G5703”, “G5710”, “G5711”, “G5712”, “G5713”, “G5720”, “G5721”, “G5722”, “G5723”, “G5730”, “G5731”, “G5732”, “G5733”, “G5740”, “G5741”, “G5742”, “G5743”, “G5770”, “G5771”, “G5772”, “G5773”, “G5780”, “G5781”, “G5782”, “G5783”, “G5790”, “G5791”, “G5792”, “G5793”                                                                                                                                                                                                                                                                                                          |
| Postoperative ileus                                                    | “K567”                                                                                                                                                                                                                                                                                                                                                                                                                                                                                                                                                                                                                                                                                                                                                                                                                                                                                                                                            |
| Urinary tract infection                                                | “N390”                                                                                                                                                                                                                                                                                                                                                                                                                                                                                                                                                                                                                                                                                                                                                                                                                                                                                                                                            |
